# Supplementary material for: Spatial and Temporal Heterogeneity of PD-L1 Expression and Tumor Mutational Burden in Gastroesophageal Adenocarcinoma at Baseline Diagnosis and after Chemotherapy
Source: Oxford University Press journal article supplement (doi:10.1158/1078-0432.ccr-20-2085), 2020-08-20
Supplement: 10780432ccr202085-sup-244296_2_supp_6472904_q99p45.docx [file 10780432ccr202085-sup-244296_2_supp_6472904_q99p45.docx]

**Supplementary Table S1.** PD-L1 status by metastatic site.

| **Metastatic site** | **Count** | **Percent PD-L1 positive** | **Concordance with primary** |
| --- | --- | --- | --- |
| Liver | 26 | 23% (6/26) | 62% (16/26) |
| Lymph node | 16 | 38% (6/16) | 56% (9/16) |
| Omentum | 4 | 50% (2/4) | 50% (2/4) |
| Peritoneum | 3 | 33% (1/3) | 67% (2/3) |
| Diaphragm | 2 | 100% (2/2) | 100% (2/2) |
| Lung | 2 | 0% (0/2) | 50% (1/2) |
| Peritoneal fluid | 2 | 0% (0/2) | 100% (2/2) |
| Ovary | 2 | 0% (0/2) | 50% (1/2) |
| Other | 5 | 20% (1/5) | 60% (3/5) |

Concordance is expressed as percentage of primary–metastatic tumor pairs with concordant PD-L1 status (number of concordant pairs / total number of pairs).

**Supplementary Table S2.** TMB by metastatic site.

| **Metastatic site** | **Count** | **Median TMB (range)** | **Concordance with primary using cutoff(s):** | |
| --- | --- | --- | --- | --- |
| **5 and 15 mut/Mb** | **10 mut/Mb** |
| Liver | 20 | 6 (1–14) | 75% (15/20) | 95% (19/20) |
| Lymph node | 15 | 5 (1–37) | 80% (12/15) | 80% (12/15) |
| Omentum | 2 | 6 (4–8) | 100% (2/2) | 100% (2/2) |
| Peritoneum | 3 | 5 (2–5) | 50% (1/3) | 100% (3/3) |
| Diaphragm | 2 | 5.5 (5–6) | 50% (1/2) | 100% (2/2) |
| Lung | 1 | 4 | 0% (0/1) | 100% (1/1) |
| Ovary | 1 | 5 | 0% (0/1) | 100% (1/1) |
| Other | 1 | 5 | 0% (0/1) | 0% (0/1) |

Concordance is expressed as percentage of primary–metastatic tumor pairs with concordant TMB using two cutoffs of >5 mut/Mb and >15 mut/Mb (TMB level) or a single cutoff of ≥10 mut/Mb (number of concordant pairs / total number of pairs).
